# Supplementary material for: Transtympanic delivery of V2O5 nanowires with a tympanic-membrane penetrating peptide
Source: Royal Society of Chemistry journal article supplement (doi:10.1039/d4bm00983e), 2024-01-01
Supplement: d4bm00983e3.pdf [file d4bm00983e3.pdf]

## Supplementary Information

for

# Transtympanic delivery of V2O5 nanowires with a tympanic- membrane penetrating peptide

Sophie S. Liu<sup>1,2</sup>, Jiayan Lang<sup>1</sup>, Shuxian Wen<sup>1</sup>, Pengyu Chen<sup>1</sup>, Haonian Shu<sup>1</sup>, Simon Shindler<sup>1</sup>,  
Wenjing Tang<sup>1</sup>, Xiaojing Ma<sup>1</sup>, Max D. Serota<sup>1</sup>, Rong Yang<sup>1,\*</sup>

<sup>1</sup> Smith School of Chemical and Biomolecular Engineering, Cornell University, Ithaca NY, 14850,  
USA

<sup>2</sup> Meinig School of Biomedical Engineering, Cornell University, Ithaca NY, 14850, USA

Step 1. Hydrothermal synthesis

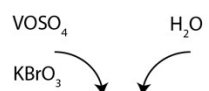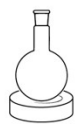

Stir at room temperature

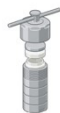

Transfer reactants into an autoclave

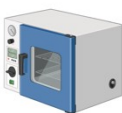

Heat in an oven at 180 °C

Step 2. Washing and drying

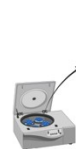

Wash with ethanol x3 times and water x3 times

Centrifuge to retrieve the nanowires after each wash

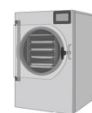

Lyophilize to remove solvents

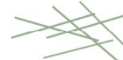

Collect  $\text{V}_2\text{O}_5$  nanowires

**Supplementary figure 1. A scheme showing the overall process of synthesizing nanowires in house.** Figure partially generated with Biorender.

**Supplementary Table 1. A selection of nanowire batches made with various synthesis conditions.**

|       | Hydrothermal synthesis conditions |      |           |           |                           |                        |
|-------|-----------------------------------|------|-----------|-----------|---------------------------|------------------------|
| Batch | Surfactant                        | pH   | Temp (°C) | Time (hr) | Other                     | Length (mean ± SEM nm) |
| B3    | none                              | <2   | 180       | 24        |                           | 1012 ± 149             |
| B5    | none                              | <2   | 180       | 6         |                           | 565 ± 89               |
| B7    | none                              | <2   | 180       | 12        |                           | 579 ± 39               |
| B9    | 0.5% PVA                          | <2   | 180       | 6         |                           | 352 ± 36               |
| B10   | 1% PEG-200                        | <2   | 180       | 6         |                           | 1536 ± 193             |
| B11   | none                              | <2   | 180       | 6         | 22 mmol VOSO <sub>4</sub> | 624 ± 44               |
| B12   | none                              | 5.85 | 180       | 6         |                           | 1781 ± 342             |
| B13   | none                              | <2   | 180       | 2         |                           | 287 ± 25               |
| B14   | 1% PEG-200                        | <2   | 180       | 2         |                           | 238 ± 19               |
| B15   | 0.1% SDS                          | <2   | 180       | 2         |                           | 548 ± 101              |
| B16   | 0.1% Triton                       | <2   | 180       | 2         |                           | 361 ± 76               |

Abbreviations: PVA: polyvinyl alcohol, PEG: polyethylene glycol, SDS: sodium dodecyl sulphate, SEM: standard error mean

NW-24h

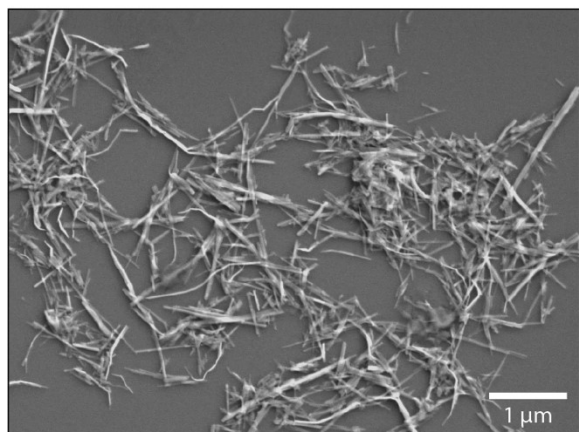

NW-12h

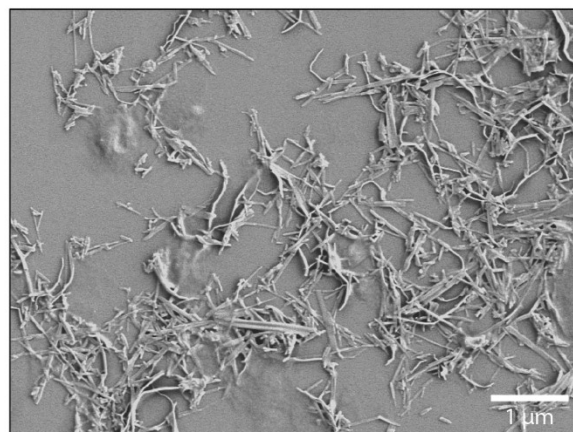

NW-6h

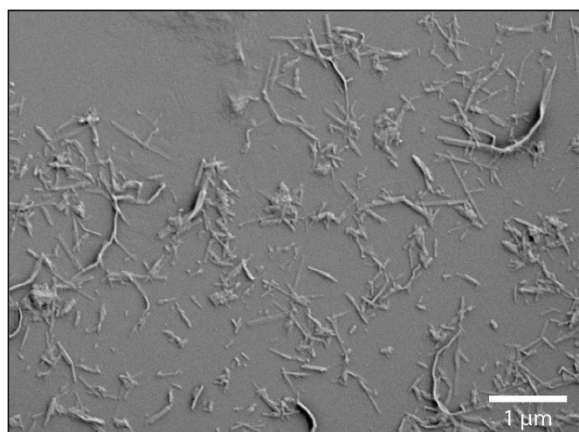

NW-2h

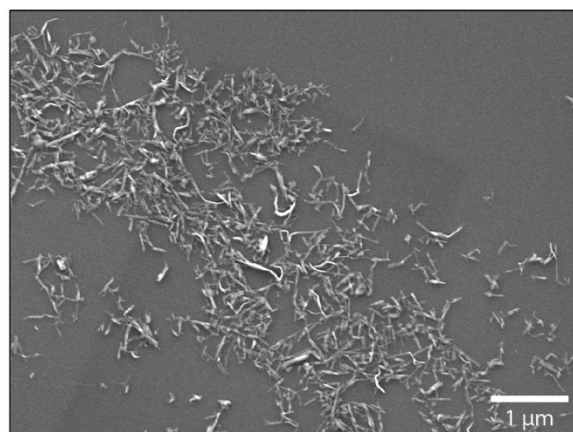

**Supplementary figure 2. Representative scanning electron microscopy (SEM) images of nanowires produced from different synthesis conditions.** High-resolution images showing the morphology of nanowires synthesized with 24-hour reaction (NW-24h), 12-hour reaction (NW-12h), 6-hour reaction (NW-6h), or 2-hour reaction (NW-2h).

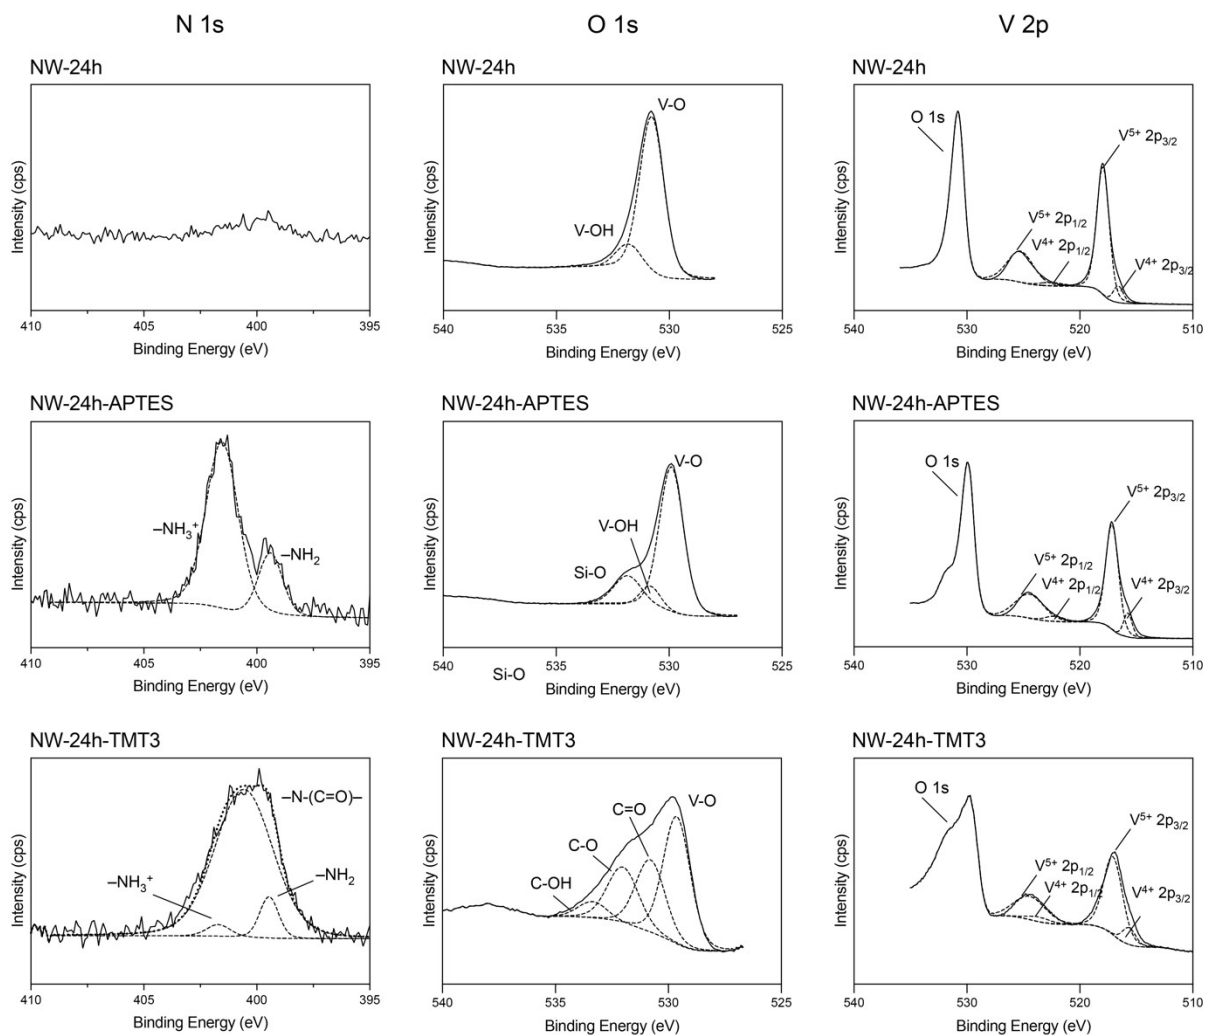

**Supplementary figure 3. High resolution X-ray photoelectron spectroscopy (XPS) scans on N 1s, O 1s and V 2p for NW-24h, NW-24h-APTES, and NW-24h-TMT3.**

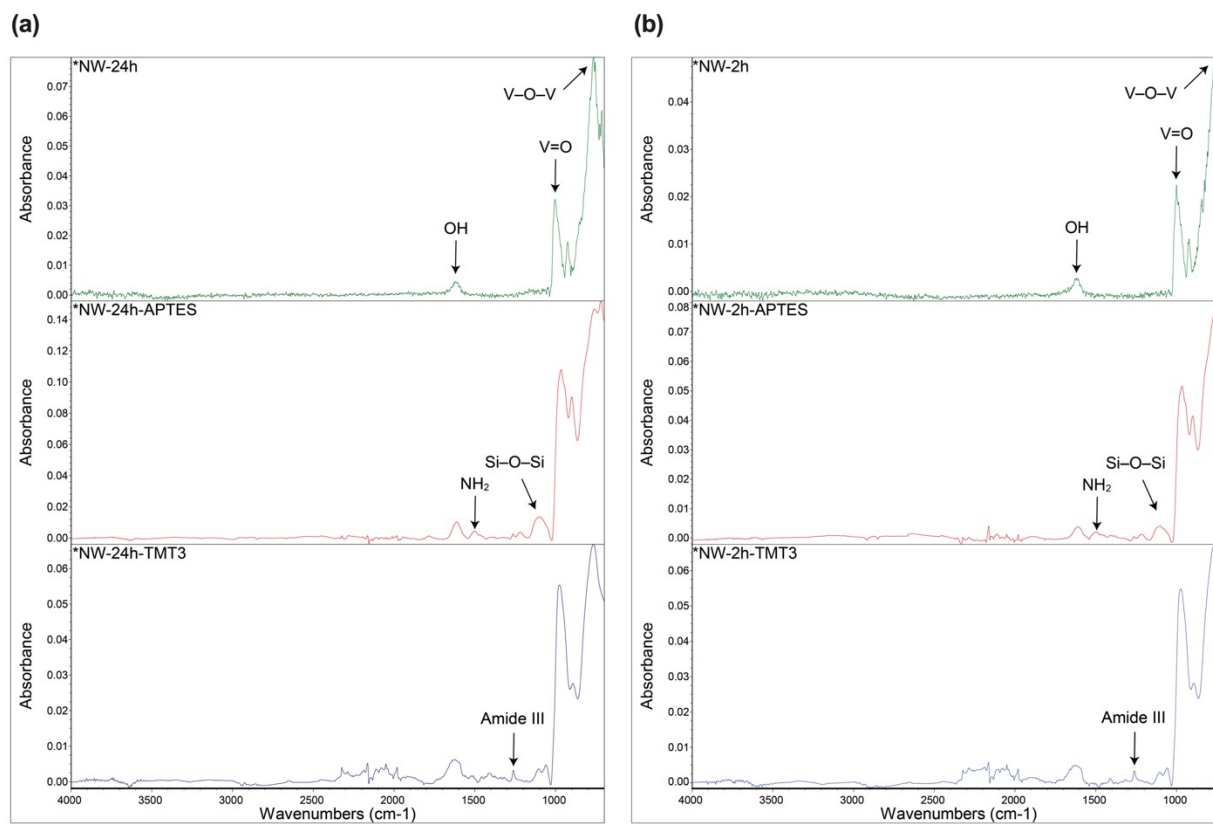

**Supplementary figure 4. Fourier-transform infrared spectroscopy (FTIR) spectra for nanowires. a)** FTIR spectra for NW-24h, NW-24h-APTES, and NW-24h-TMT3, **b)** FTIR spectra for NW-2h, NW-2h-APTES, and NW-2h-TMT3.

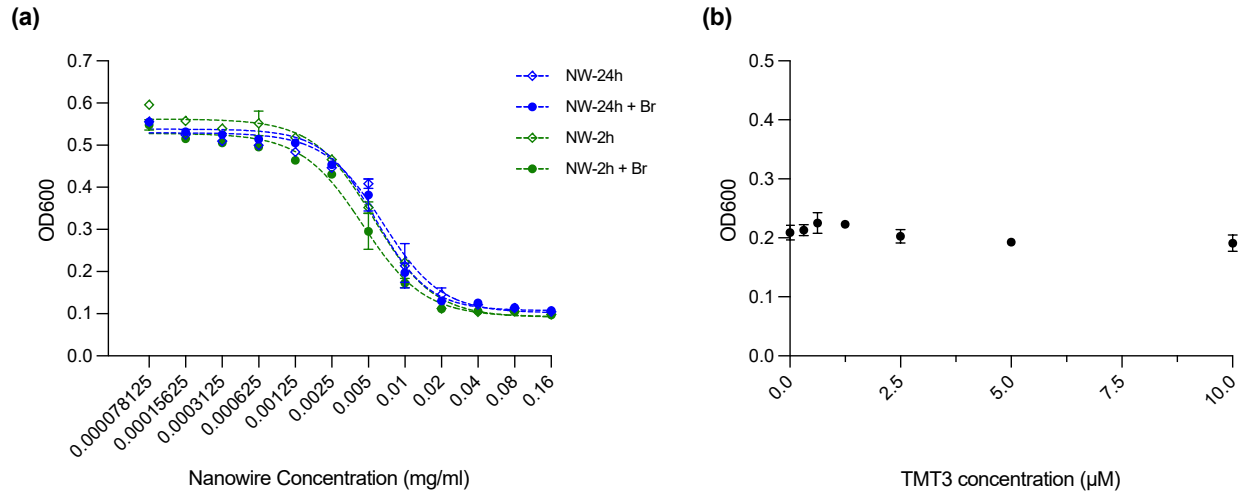

**Supplementary figure 5. Concentration-dependent kill curve for nanowires against *S. pneumoniae*.** **a)** The OD600 reading on *S. pneumoniae* culture treated with 0.000078125 – 0.16 mg/mL of NW-24h and NW-2h, with or without 1 mM KBr, and the fitted MIC50 curve shown in dashed lines. **b)** The OD600 reading on *S. pneumoniae* culture treated with 0 – 10 µM of TMT3 peptide; no antibiotic effect of TMT3 peptide was observed for concentrations up to 10 µM.

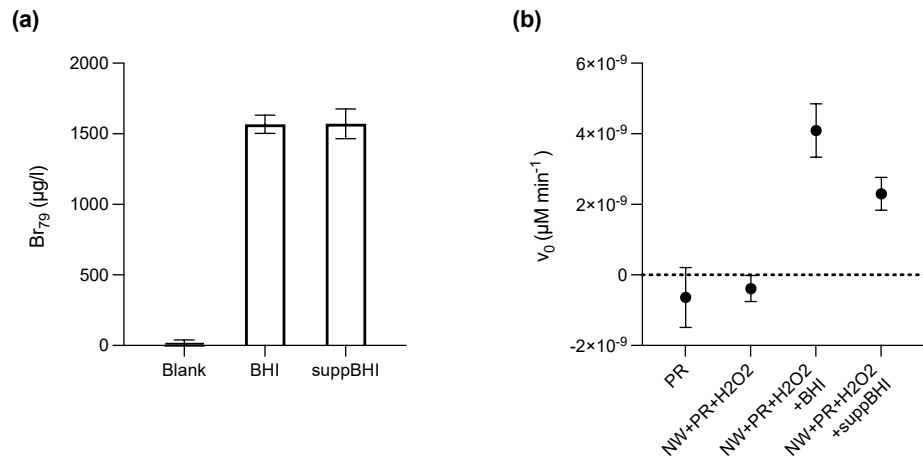

**Supplementary figure 6. Bromide ion content in bacteria culture media. a)** Inductively coupled plasma mass spectroscopy (ICP-MS) analysis showing the measured Br-79 content in blank sample, BHI media, and supplemented BHI (suppBHI). **b)** Catalytic activities measured using the phenol red (PR) bromination assay suggest the presence of bromide ions in bacteria culture media to support HOBr generation; formulations compositions are listed as follows, [PR]: 50 µM PR only, [NW + PR + H<sub>2</sub>O<sub>2</sub>]: 0.04 mg/mL NW-2h + 50 µM PR + 5 mM H<sub>2</sub>O<sub>2</sub>, [NW + PR + H<sub>2</sub>O<sub>2</sub> + BHI]: 0.04 mg/mL NW-2h + 50 µM PR + 5 mM H<sub>2</sub>O<sub>2</sub> + 26% BHI media, [NW + PR + H<sub>2</sub>O<sub>2</sub> + suppBHI]: 0.04 mg/mL NW-2h + 50 µM PR + 5 mM H<sub>2</sub>O<sub>2</sub> + 26% suppBHI media.



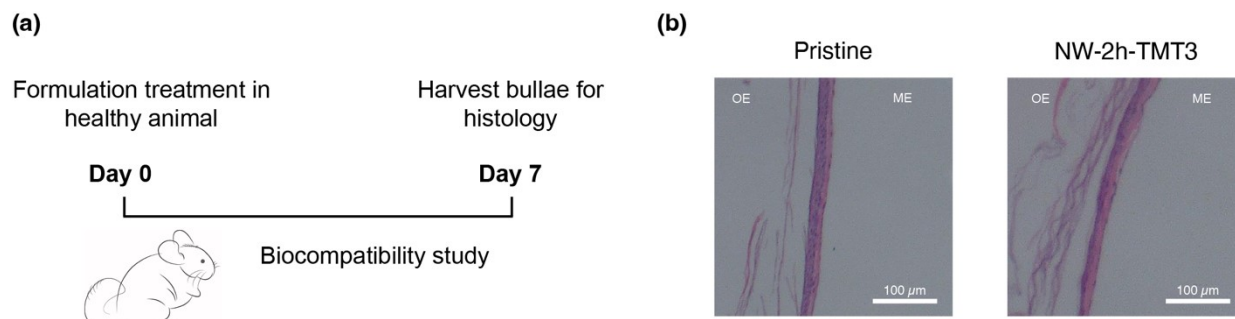

**Supplementary figure 7. Biocompatibility study.** **a)** A scheme showing the *in vivo* biocompatibility study timeline. **b)** A representative image showing the cross-sections of tympanic membranes that were untreated (pristine) or treated with 0.6 mg of NW-2h-TMT3 and 120  $\mu$ g of Br<sup>-</sup> (NW-2h-TMT3) for 7 days in healthy chinchillas, OE = outer ear, ME = middle ear, scale bar = 100  $\mu$ m.

NW-24h

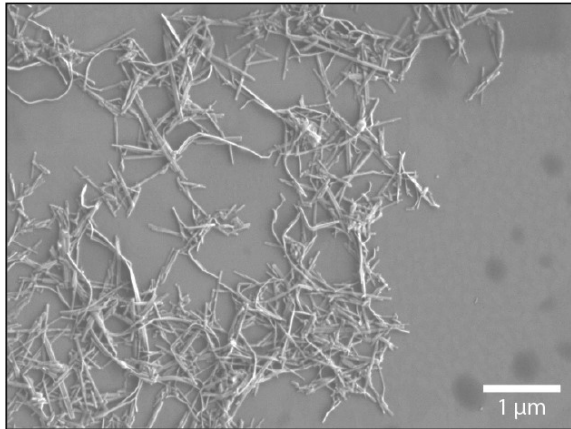

NW-2h

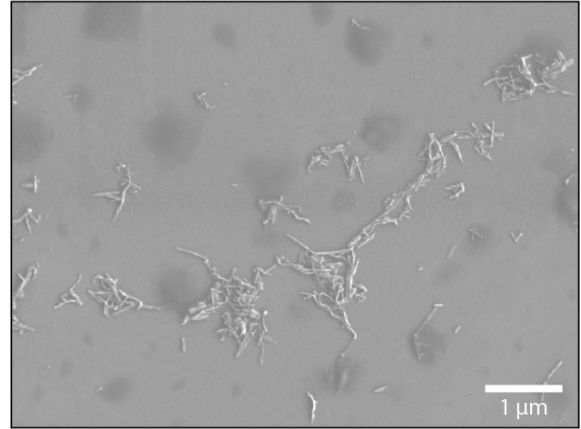

**Supplementary figure 8. Nanowire stability after incubation in saline.** SEM images showing the morphology of nanowires that were incubated in phosphate buffered saline (PBS) for 120 hours at 37 °C. Scale bar = 1 μm.
