# Supplementary figures and images for: Transtympanic delivery of V2O5 nanowires with a tympanic-membrane penetrating peptide
Source: Royal Society of Chemistry journal article supplement (doi:10.1039/d4bm00983e), 2024-01-01

NW-24h

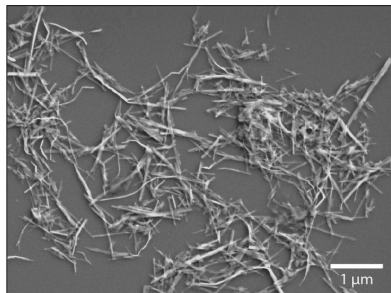

NW-12h

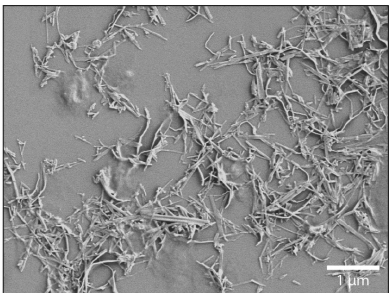

NW-6h

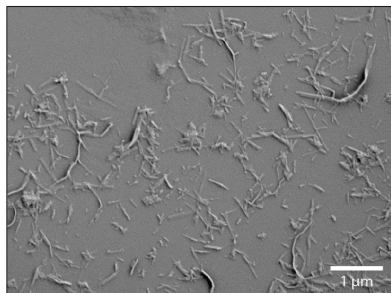

NW-2h

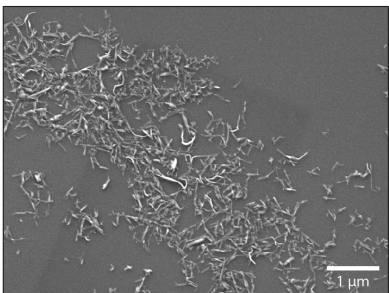

Supplement: d4bm00983e2.pdf [file d4bm00983e2.pdf]
